# Supplementary material for: Iron(ii) complexes with a terpyridine embrace packing motif show remarkably consistent cooperative spin-transitions
Source: Royal Society of Chemistry journal article supplement (doi:10.1039/b613402e), 2006-11-14
Supplement: b613402e.pdf [file b613402e.pdf]

# Spin-Crossover Iron(II) Complexes With a Terpyridine Embrace Packing Motif Show Remarkably Consistent Cooperative Spin-Transitions

*Ruth Pritchard, Colin A. Kilner and Malcolm A. Halcrow\**

## Electronic Supplementary Information

**Table S1** Selected bond lengths and angles for the high-spin tetragonal phases of  $[\text{Fe}(\text{L}^3)_2][\text{BF}_4]_2$  and  $[\text{Fe}(\text{L}^4)_2][\text{BF}_4]_2$ .

**Table S2** Selected bond lengths and angles for the low-spin monoclinic phase of  $[\text{Fe}(\text{L}^3)_2][\text{BF}_4]_2$  at 202 K.

**Figure S1** View of the complex dication in the monoclinic phase of  $[\text{Fe}(\text{L}^3)_2][\text{BF}_4]_2$  at 202 K.

**Figure S2** View of the complex dication in the tetragonal phase of  $[\text{Fe}(\text{L}^4)_2][\text{BF}_4]_2$  at 300 K.

**Table S1** Selected bond lengths and angles (Å, °) for the high-spin tetragonal phases of  $[\text{Fe}(\text{L}^3)_2][\text{BF}_4]_2$  and  $[\text{Fe}(\text{L}^4)_2][\text{BF}_4]_2$ . Symmetry code (ii)  $-1+y, 1-x, 2-z$  (see Figs. 2 and S2).

|                                | $[\text{Fe}(\text{L}^3)_2][\text{BF}_4]_2$ |            | $[\text{Fe}(\text{L}^4)_2][\text{BF}_4]_2$ |
|--------------------------------|--------------------------------------------|------------|--------------------------------------------|
|                                | 300 K                                      | 220 K      | 300 K                                      |
| Fe(1)–N(2)                     | 2.135(3)                                   | 2.143(5)   | 2.125(4)                                   |
| Fe(1)–N(7)                     | 2.188(2)                                   | 2.180(4)   | 2.188(3)                                   |
| N(2)–Fe(1)–N(2 <sup>ii</sup> ) | 180                                        | 180        | 180                                        |
| N(2)–Fe(1)–N(7)                | 72.97(6)                                   | 73.23(10)  | 73.46(8)                                   |
| N(2)–Fe(1)–N(7 <sup>ii</sup> ) | 107.03(6)                                  | 106.77(10) | 106.54(8)                                  |
| N(7)–Fe(1)–N(7 <sup>ii</sup> ) | 94.92(3)                                   | 94.77(5)   | 94.65(5)                                   |

**Table S2** Selected bond lengths and angles (Å, °) for the low-spin monoclinic phase of  $[\text{Fe}(\text{L}^3)_2][\text{BF}_4]_2$  at 202 K.

|                   |          |
|-------------------|----------|
| Fe(1)–N(2)        | 1.898(5) |
| Fe(1)–N(9)        | 1.974(5) |
| Fe(1)–N(15)       | 1.955(6) |
| Fe(1)–N(20)       | 1.890(5) |
| Fe(1)–N(27)       | 1.985(5) |
| Fe(1)–N(33)       | 1.963(6) |
| N(2)–Fe(1)–N(9)   | 79.8(2)  |
| N(2)–Fe(1)–N(15)  | 80.1(2)  |
| N(2)–Fe(1)–N(20)  | 176.9(3) |
| N(2)–Fe(1)–N(27)  | 102.5(3) |
| N(2)–Fe(1)–N(33)  | 96.8(3)  |
| N(9)–Fe(1)–N(15)  | 160.0(2) |
| N(9)–Fe(1)–N(20)  | 101.4(2) |
| N(9)–Fe(1)–N(27)  | 92.7(2)  |
| N(9)–Fe(1)–N(33)  | 91.6(2)  |
| N(15)–Fe(1)–N(20) | 98.7(2)  |
| N(15)–Fe(1)–N(27) | 91.3(2)  |
| N(15)–Fe(1)–N(33) | 91.0(2)  |
| N(20)–Fe(1)–N(27) | 80.3(2)  |
| N(20)–Fe(1)–N(33) | 80.4(2)  |
| N(27)–Fe(1)–N(33) | 160.7(2) |

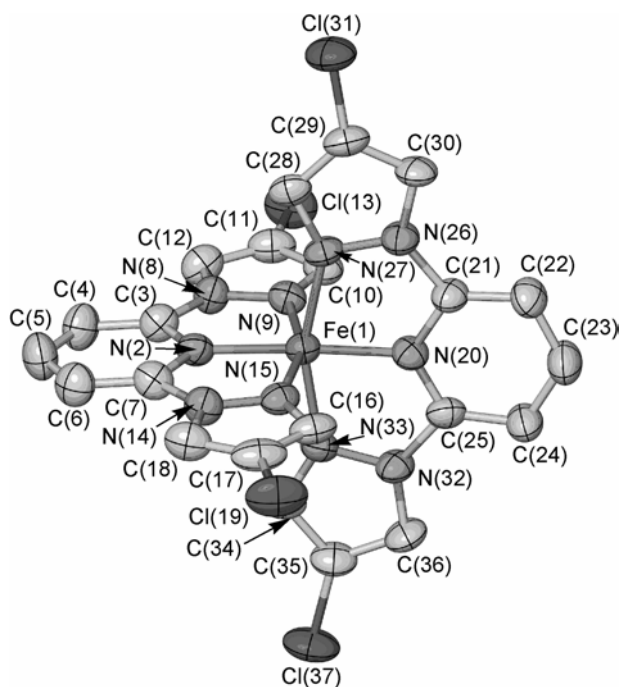

**Fig S1** View of the complex dication in the monoclinic phase of  $[\text{Fe}(\text{L}^3)_2][\text{BF}_4]_2$  at 202 K. All H atoms have been removed for clarity, and thermal ellipsoids are at the 50% probability level.

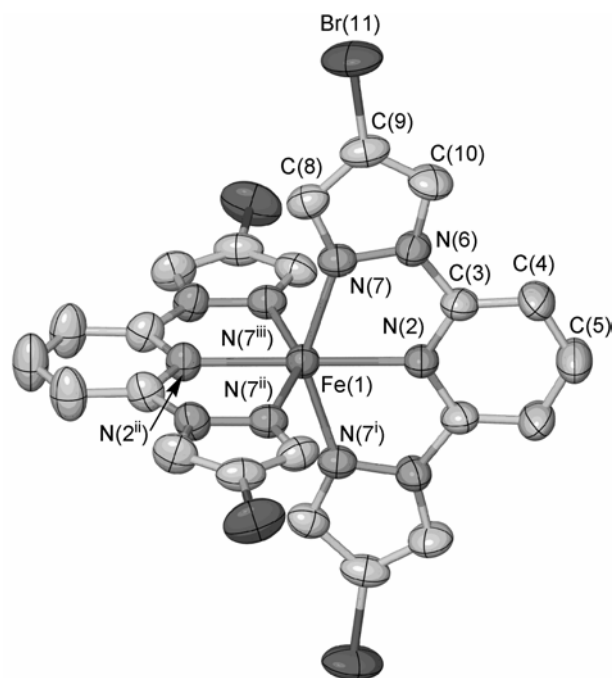

**Fig S2** View of the complex dication in the tetragonal phase of  $[\text{Fe}(\text{L}^4)_2][\text{BF}_4]_2$  at 300 K. All H atoms have been removed for clarity, and thermal ellipsoids are at the 50% probability level. Symmetry codes: (i)  $-x, 2-y, z$ ; (ii)  $-1+y, 1-x, 2-z$ ; (iii)  $1-y, 1+x, 2-z$ .
